# Supplementary material
Source: PubMed Central journal article supplement (PMC6218175)
Supplement: NIHMS993217-supplement-1.pdf [file NIHMS993217-supplement-1.pdf]

## Supplementary material

**Title:** Direct loading of CTL epitopes onto MHC class I complexes on dendritic cell surface *in vivo*

**Authors:** Peng Wang, Shuyun Dong, Peng Zhao, Xiao He, and Mingnan Chen

### Supplementary Figure 1

#### Figure S1

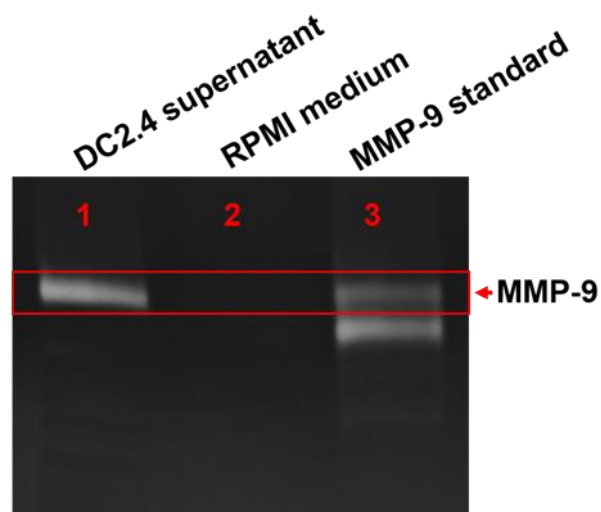

**Figure S1.** DC2.4 can secrete MMP-9 as demonstrated by the gelatin zymography assay.

## Figure S2

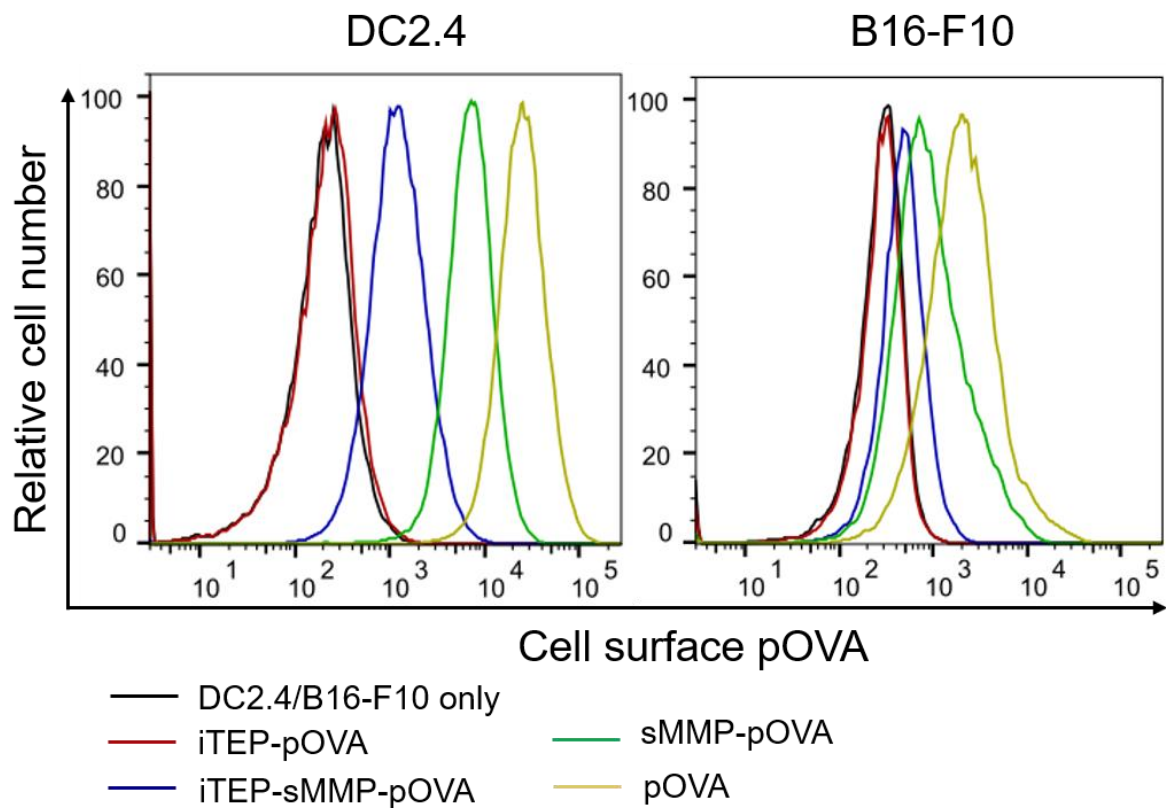

**Figure S2.** Representative flow cytometry plots showed the pOVA presentation on cell surface of different vaccines. DC2.4 or B16-F10 cells were incubated with pOVA, sMMP-pOVA, iTEP-sMMP-pOVA, iTEP-pOVA, or cell culture medium. The cells were then stained with anti-pOVA/MHC class I complexes antibody and analyzed by flow cytometry.

Supplementary Figure 3

Figure S3

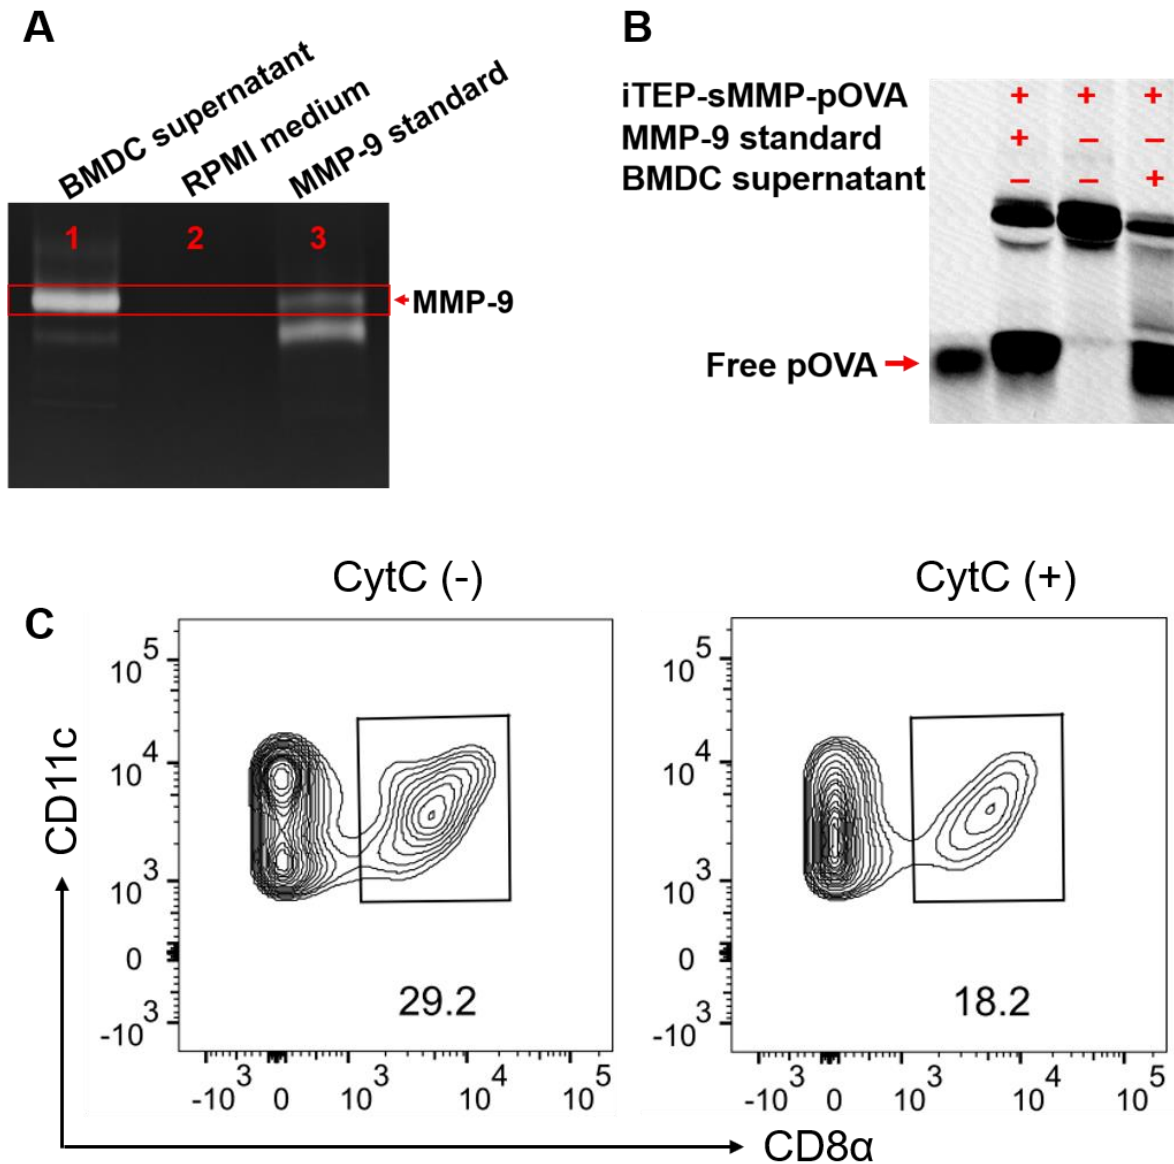

**Figure S3.** (A) BMDC can secrete MMP-9 as demonstrated by the gelatin zymography assay. (B) BMDC supernatant can cut pOVA epitope from iTEP-sMMP-pOVA as evidenced by the SDS-PAGE. (C) Injection of cytochrome c (CytC) reduced CD8<sup>+</sup> DCs in mice. Representative flow cytometry plots showed the percentage of CD8<sup>+</sup> DCs among the whole DC population from mice treated with or without CytC. Numbers in the plot indicated the percentage of CD8<sup>+</sup> DCs.

Supplementary Figure 4

Figure S4

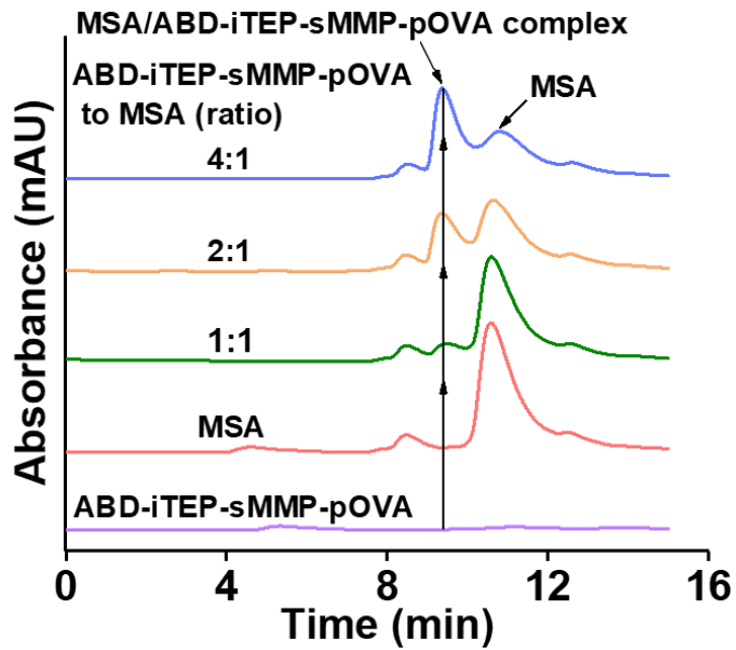

Figure S4. ABD-iTEP-sMMP-pOVA can bind to mouse serum albumin (MSA) as evidenced by size exclusion chromatography (SEC).
